# Supplementary material
Source: PubMed Central journal article supplement (PMC6156894)

## **SUPPLEMENTAL METHODS**

### **Differential white blood cell counts in the BALF by flow cytometry.**

After cyto-centrifugation of collected BALFs, 20 µl of reconstituted cell pellets were pre-mixed for 20 min at room temperature in the dark, with a cocktail of antibodies: V500 conjugated rat anti-mouse CD45, Alexa Fluor 700 conjugated rat anti mouse Ly-6G, Alexa Fluor 488 conjugated CD11b, and PE conjugated rat anti mouse CD115 (all from BD Bioscience). After fixation in 1% paraformaldehyde for 10min, cells were diluted in 300 µl PBS to block fixation. Before flow cytometry analysis (BD LSR II), 10 µl of flow-count fluorospheres (Beckman Coulter) was added to determine the concentration of subpopulations. Results were analyzed by the gating analysis of CD45<sup>+</sup> cells (leukocytes) and separation of three subpopulations : 1) CD11<sup>-</sup> cells (lymphocytes), 2) CD11b<sup>+</sup>Ly6G<sup>+</sup>CD115<sup>low</sup> (neutrophils) and 3) CD11b<sup>+</sup>Ly6G<sup>-</sup>CD115<sup>+</sup> (monocytes/macrophages).

### **Determination of haemoglobin content in BALF**

After cyto-centrifugation of collected BALFs, hemoglobin content of cell pellet was measured by absorbance reading at 405 nm after a 4 fold-dilution in formic acid.

## SUPPLEMENTAL FIGURE LEGENDS

### **Figure 1: Differential white blood cell counts in the BALF by flow cytometry.**

Collected BALFs from the various groups of mice were pre-mixed with a cocktail of antibodies to detect neutrophils, lymphocytes and monocytes/macrophages, and 10  $\mu$ l of flow-count fluorospheres to determine the concentration of each type of white blood cells. Data (mean  $\pm$  SEM; n= 9-14 per group; \*\* $P$ <0.01, \*\*\* $P$ <0.001) were analyzed by 1-way ANOVA with a Tukey's multiple comparison test.

### **Figure 2. Hydroxyproline contents in lung tissues from *PN-I<sup>+/+</sup>* mice.**

Hydroxyproline contents in lung tissues from *PN-I<sup>+/+</sup>* mice were measured 3, 9, and 14 days after bleomycin (BLM) treatment vs saline treatment (Sham). Data (mean  $\pm$  SEM; n= 5-7 per group) were analyzed by 2-tailed Mann-Whitney U test. \*\* $P$ <0.01 vs sham.

### **Figure 3. Effect of thrombin inhibition by argatroban in bleomycin-injured *PN-I<sup>+/+</sup>* mice.**

*PN-I<sup>+/+</sup>* mice were subjected to bleomycin-induced lung injury (BLM) (2 mg/kg) and treated daily with Argatroban (9 mg/kg i.p.). (A) Percentages of surviving *PN-I<sup>+/+</sup>* mice were plotted over a 14-days period. Log-rank test was used to compare the difference between *PN-I<sup>+/+</sup>* mice with BLM and *PN-I<sup>+/+</sup>* mice with BLM plus argatroban (*PN-I<sup>+/+</sup>* BLM: n= 6, *PN-I<sup>+/+</sup>* BLM + Argatroban: n= 11). (B) After cyto-centrifugation of collected BALFs from the various groups of mice, hemoglobin content was measured by absorbance reading at 405 nm after a 4 fold-dilution in formic acid.

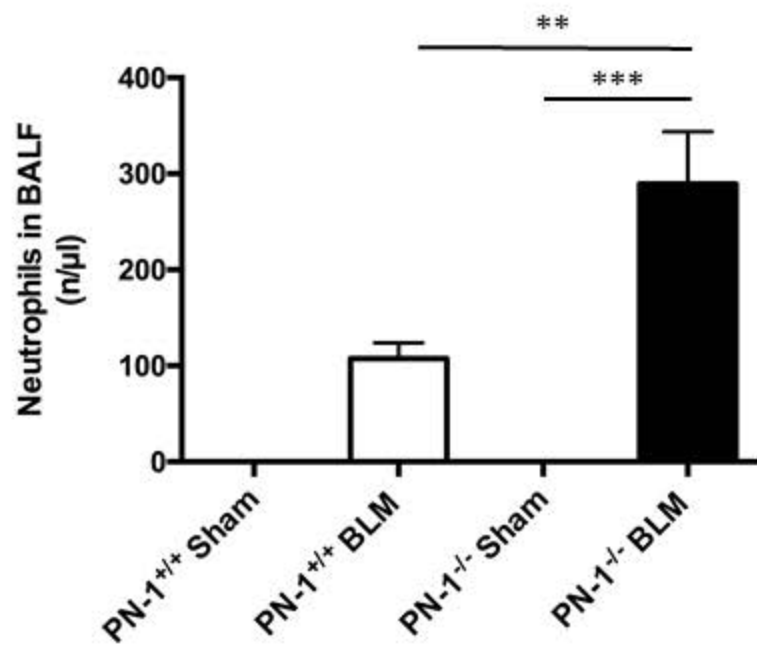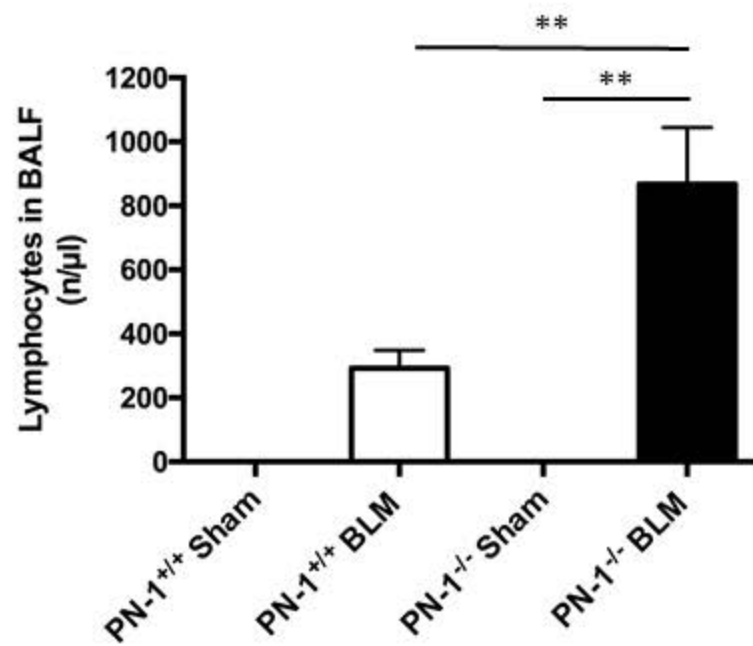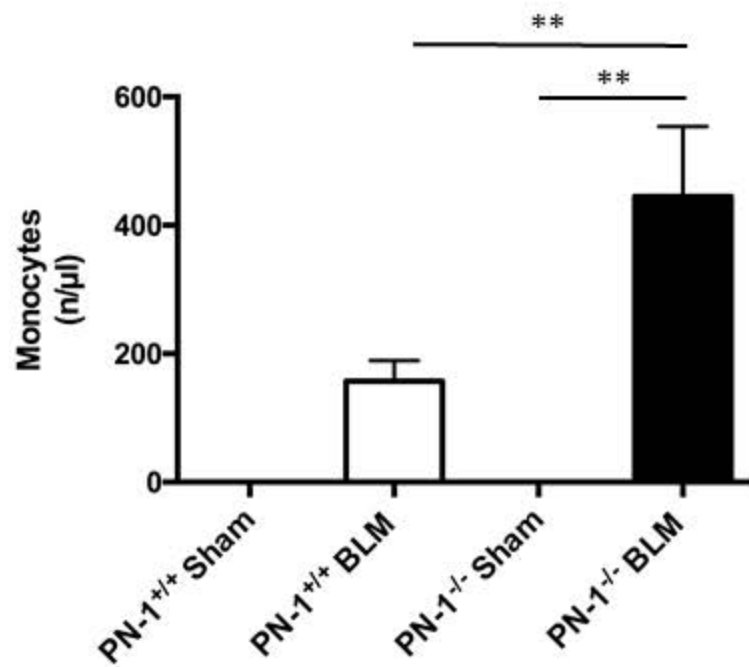

Supplemental Figure 1

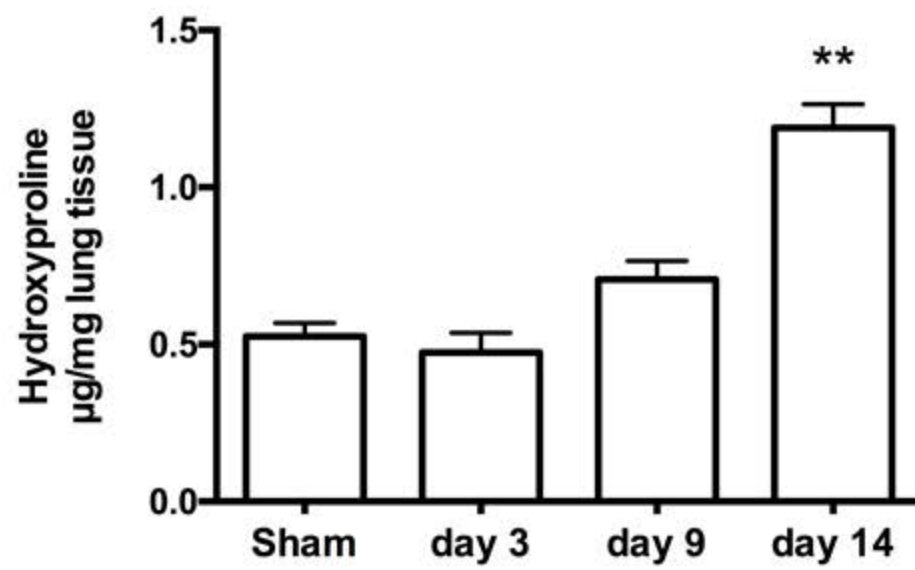

**A**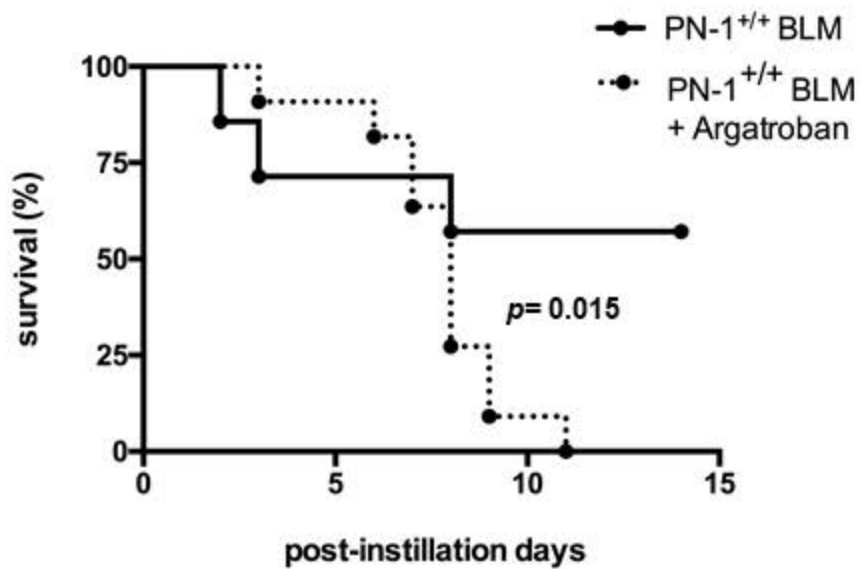**B**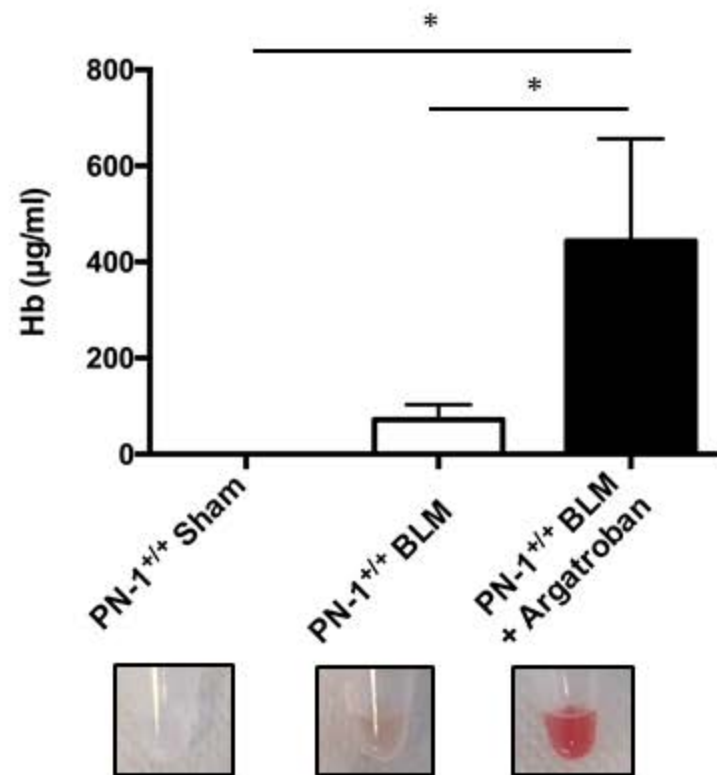

Supplement: ba018283-suppl1.pdf [file ba018283-suppl1.pdf]
